# Supplementary material for: The Role of Elevated Branched-Chain Amino Acids in the Effects of Vertical Sleeve Gastrectomy to Reduce Weight and Improve Glucose Regulation
Source: PubMed Central journal article supplement — Cell Rep. Author manuscript; Available in PMC 2020 Nov 2. (PMC7605275; doi:10.1016/j.celrep.2020.108239), 2020-10-13
Supplement: NIHMS1638445-supplement-1.pdf [file NIHMS1638445-supplement-1.pdf]

**Cell Reports, Volume 33**

**Supplemental Information**

**The Role of Elevated Branched-Chain Amino Acids  
in the Effects of Vertical Sleeve Gastrectomy  
to Reduce Weight and Improve Glucose Regulation**

**Nadejda Bozadjieva Kramer, Simon S. Evers, Jae Hoon Shin, Sierra Silverwood, Yibin Wang, Charles F. Burant, Darleen A. Sandoval, and Randy J. Seeley**

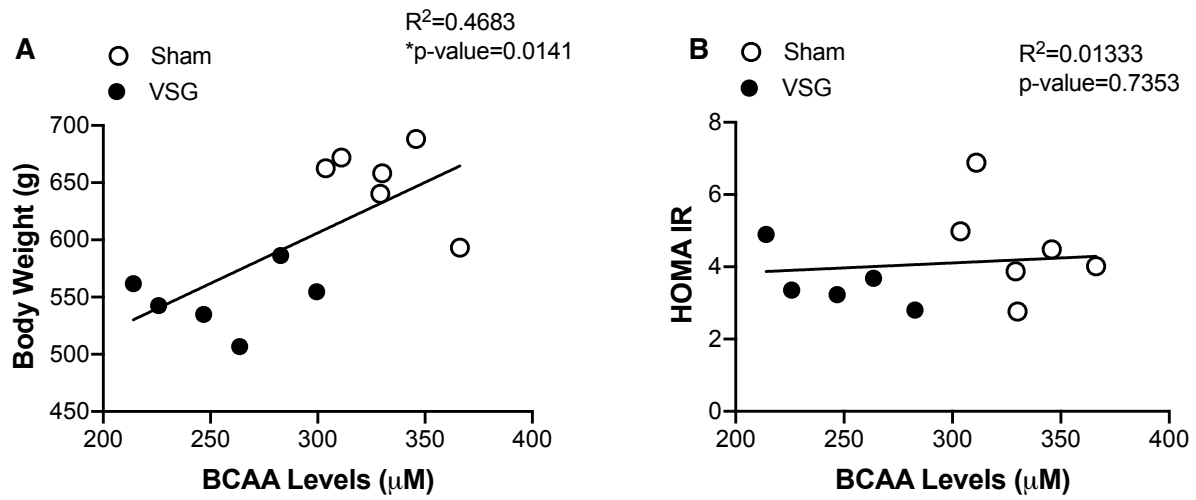

**Figure S1. Circulating BCAA levels correlate with body weight, but not insulin resistance in Sham and VSG rats fed HFD. Related to Figure 1.** Circulating BCAA levels (14 days post-surgery) are positively correlated with **A**) body weight change (28 days post-surgery), but not **B**) HOMA IR (28 days post-surgery). Animal number n=5-6/group. Data analyzed by simple linear regression analysis \*  $p < 0.05$ .

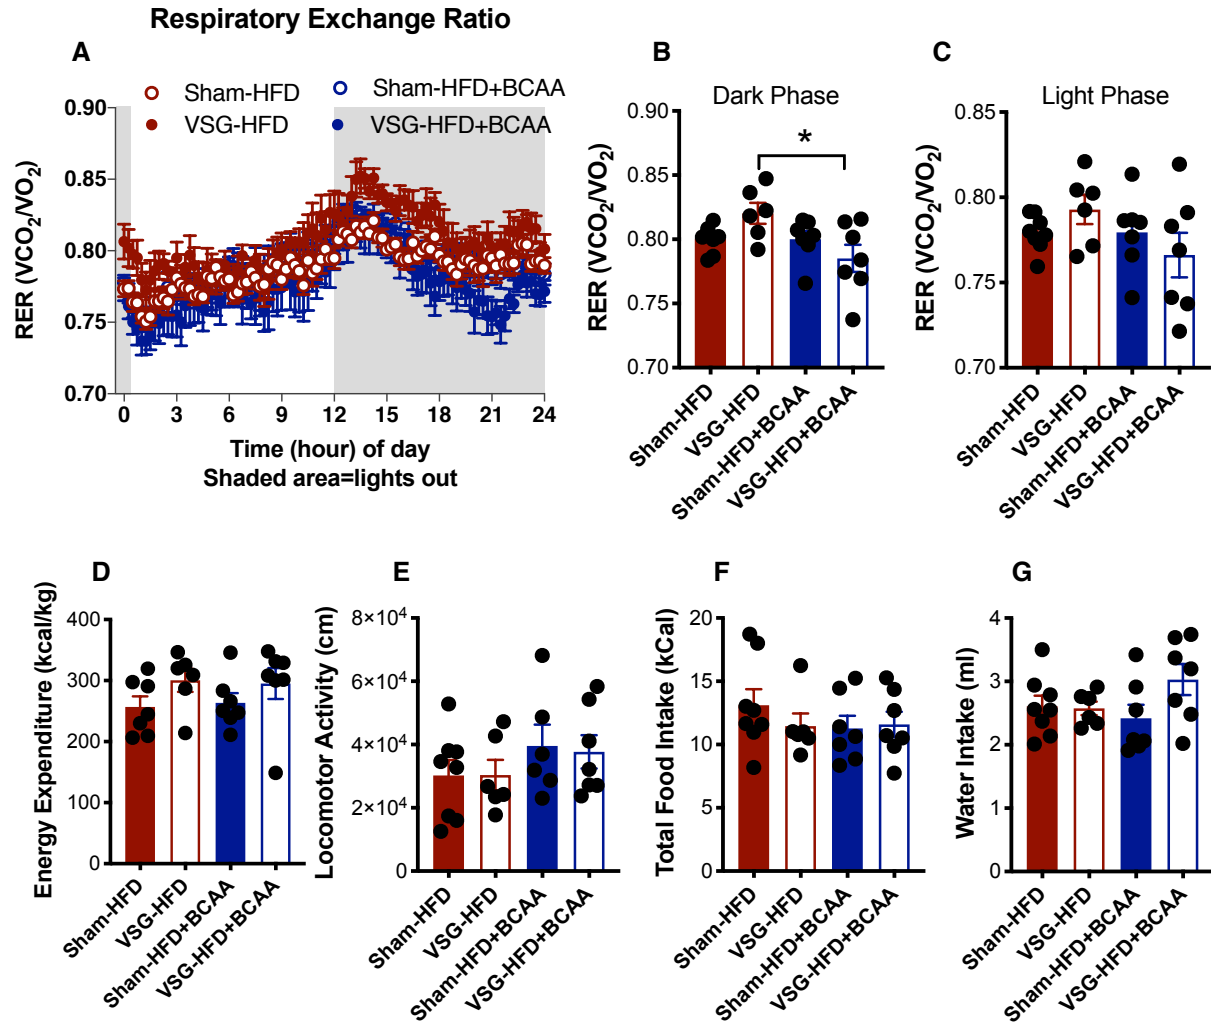

**Figure S2. HFD supplementation with BCAA lowers Respiratory Exchange Ratio after VSG. Related to Figures 2 and 3. A)** Respiratory Exchange Ratio RER ( $VCO_2/VO_2$ ) for 24-hour period. Respiratory Exchange Ratio RER ( $VCO_2/VO_2$ ) for **B)** Dark and **C)** Light phase. **D)** Energy Expenditure (kCal/kg). **E)** Locomotor Activity (cm). **F)** Total Food intake (kCal) and **G)** Total Water Intake for Sham-HFD (n=8), VSG-HFD (n=6), Sham-HFD+BCAA (n=7) and VSG-HFD+BCAA (n=7). Data represent average values for three consecutive days of recording. Shaded region in panel A represents dark phase. Data are shown as means  $\pm$  S.E.M. \*  $p < 0.05$ ; (2-Way ANOVA with Tukey's post-test).

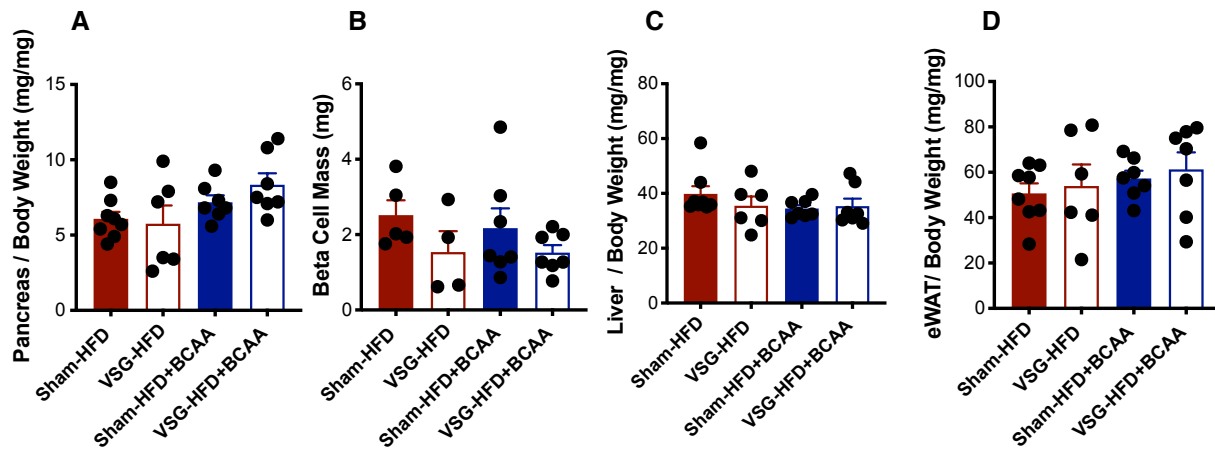

**Figure S3. Dietary supplementation of high fat diet with BCAA does not alter pancreas weight, pancreatic beta cell mass, liver and epididymal white adipose tissue (eWAT).**

**Related to Figures 2 and 3. A)** Pancreas weights normalized to body weight in Sham HFD (n=8), VSG-HFD (n=6), Sham-HFD+BCAA (n=7) and VSG-HFD+BCAA (n=7). **B)** Pancreatic beta cell mass in Sham HFD (n=5), VSG-HFD (n=4), Sham-HFD+BCAA (n=7) and VSG-HFD+BCAA (n=7). **C)** Liver weights normalized to body weight in Sham HFD (n=8), VSG-HFD (n=6), Sham-HFD+BCAA (n=7) and VSG-HFD+BCAA (n=7). **D)** Epididymal white adipose tissue (eWAT) weight normalized to body weight in Sham HFD (n=5-8), VSG-HFD (n=4-6), Sham-HFD+BCAA (n=7) and VSG-HFD+BCAA (n=7). Data are shown as means  $\pm$  S.E.M. \*  $p < 0.05$ ; (2-Way ANOVA with Tukey's post-test).

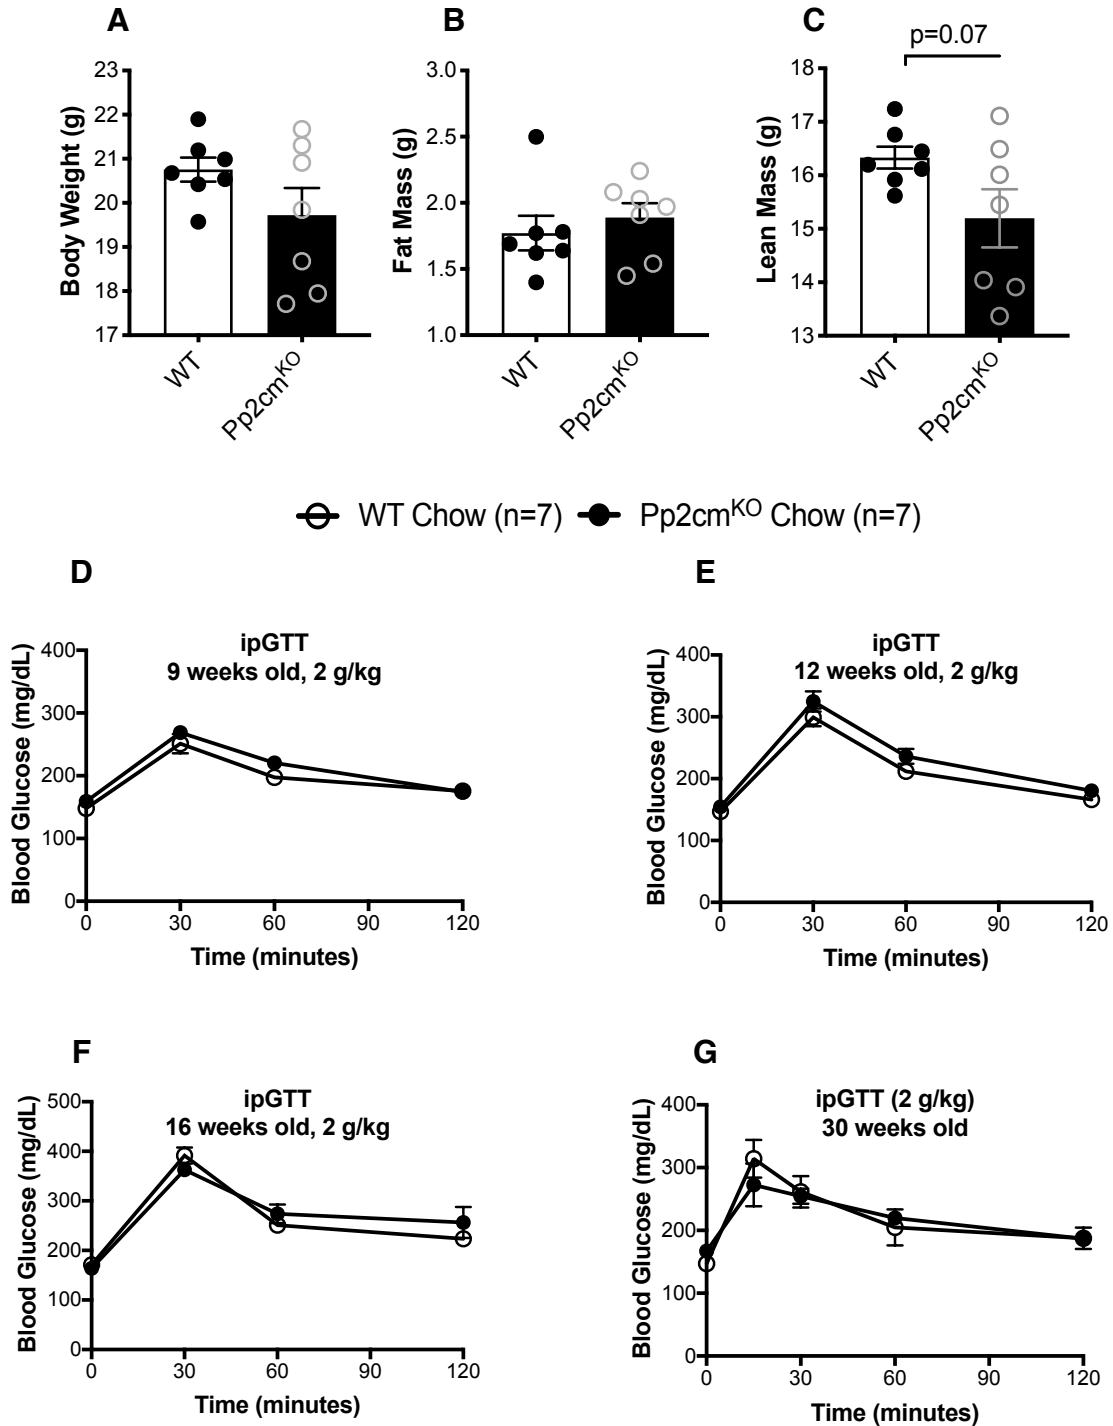

**Figure S4. Impaired BCAA catabolism does not lead to glucose intolerance in standard chow-fed mice. Related to Figures 6 and 7. A)** Body weight, **B)** Fat mass and **C)** Lean mass of 6-week old Pp2cm<sup>KO</sup> and littermate WT controls fed standard chow diet. Intraperitoneal tolerance tests (ipGTT; 2 g/kg) were performed in **D)** 9-weeks old, **E)** 12-weeks old, **F)** 16-weeks old and **G)** 30-weeks old standard chow-fed Pp2cm<sup>KO</sup> and littermate WT controls (n=7/genotype). Data are shown as means  $\pm$  S.E.M. \* p<0.05; (Student's 2-tailed *t* test).

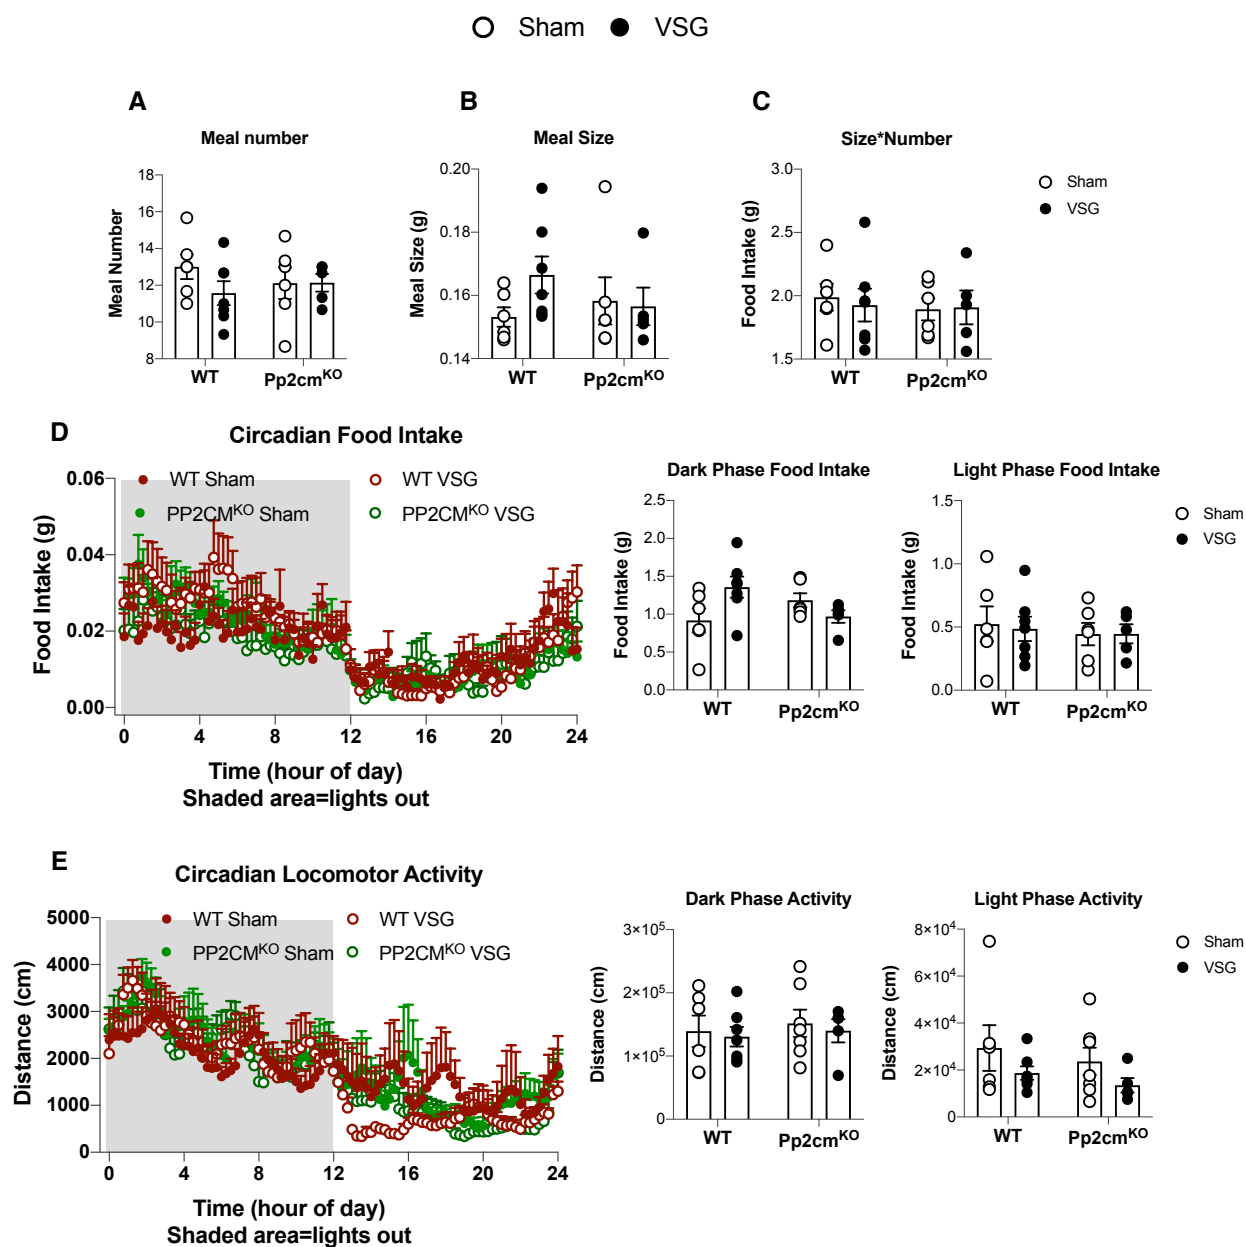

**Figure S5. Impaired BCAA catabolism does not change food intake and locomotor activity in Sham and VSG mice. Related to Figures 6 and 7. A) Meal size, B) Meal number, and C) Meal size\*Number. D) Circadian, E) Dark phase, and F) Light phase food intake. G) Circadian, H) Dark phase, and I) Light phase locomotor activity. Animals: WT HFD-Sham (n=7), WT HFD-VSG (n=6), Pp2cm<sup>KO</sup> HFD-Sham (n=5), Pp2cm<sup>KO</sup> HFD-VSG (n=5). Data are shown as means ± S.E.M. \* p<0.05; (2-Way ANOVA with Tukey's post-test).**

**Table S1.** Special diet composition formulated and purchased by Research Diets, Inc. (New Jersey, US). Related to Figures 2 and 3.

| <b>Product</b>                        | <b>Control HFD (gm)<br/>D16121101</b> | <b>HFD+BCAA (gm)<br/>D16121102</b> |
|---------------------------------------|---------------------------------------|------------------------------------|
| Casein, 80 Mesh                       | 100                                   | 100                                |
| L-Cystine                             | 3.35                                  | 1.05                               |
| L-Isoleucine                          | 4.2                                   | 16.8                               |
| L-Leucine                             | 7.74                                  | 30.96                              |
| L-Lysine                              | 6.5                                   | 2.04                               |
| L-Methionine                          | 2.3                                   | 0.72                               |
| L-Phenylalanine                       | 4.4                                   | 1.38                               |
| L-Threonine                           | 3.35                                  | 1.05                               |
| L-Tryptophan                          | 1.05                                  | 0.33                               |
| L-Valine                              | 5                                     | 20                                 |
| L-Histidine                           | 2.3                                   | 0.72                               |
| L-Alanine                             | 2.3                                   | 0.72                               |
| L-Arginine                            | 3.15                                  | 1.0                                |
| L-Aspartic Acid                       | 5.7                                   | 1.79                               |
| L-Glutamic Acid                       | 18.4                                  | 5.78                               |
| Glycine                               | 1.6                                   | 0.50                               |
| L-Proline                             | 10.3                                  | 3.24                               |
| L-Serine                              | 4.75                                  | 1.49                               |
| L-Tyrosine                            | 4.65                                  | 1.46                               |
| BCAA (including casein)               | 16.94                                 | 67.76                              |
| Non-BCAAs (including casein)          | 74.10                                 | 23.27                              |
| Total L-Amino Acids                   | 91.04                                 | 91.03                              |
| Maltodextrin                          | 125                                   | 125                                |
| Sucrose                               | 68.8                                  | 68.8                               |
| Cellulose, BW200                      | 50                                    | 50                                 |
| Corn Starch                           | 0                                     | 0                                  |
| Soybean Oil                           | 25                                    | 25                                 |
| Lard                                  | 245                                   | 245                                |
| Fiber                                 | 50                                    | 50                                 |
| Mineral Mix, S10026                   | 10                                    | 10                                 |
| DiCalcium Phosphate                   | 13                                    | 13                                 |
| Calcium Carbonate                     | 5.5                                   | 5.5                                |
| Potassium Citrate, 1 H <sub>2</sub> O | 16.5                                  | 16.5                               |
| Sodium Bicarbonate                    | 3.5                                   | 3.5                                |
| Vitamin Mix, V10001                   | 10                                    | 10                                 |
| Choline Bitartrate                    | 2                                     | 2                                  |
| FD&C Yellow Dye #5                    | 0.05                                  | 0.025                              |
| FD&C Red Dye #40                      | 0                                     | 0.025                              |
| Total grams of diet                   | 765.39                                | 765.38                             |
| Protein kCal%                         | 18                                    | 18                                 |
| Carbohydrate kCal%                    | 21                                    | 21                                 |
| Fat kCal%                             | 61                                    | 61                                 |

**Table S2.** Special diet composition formulated and purchased by Research Diets, Inc. (New Jersey, US). Related to Figures 2 and 3.

| <b>Amino Acid</b>                                                               | <b>Control HFD<br/>(gm/kg diet)<br/>D16121101</b>                               | <b>HFD+BCAA<br/>(gm/kg diet)<br/>D16121102</b>                                                                           | <b>NRC<br/>Requirement<br/>(gm/kg diet)</b> |
|---------------------------------------------------------------------------------|---------------------------------------------------------------------------------|--------------------------------------------------------------------------------------------------------------------------|---------------------------------------------|
| L-Cystine                                                                       | 5.2                                                                             | 2.2                                                                                                                      |                                             |
| L-Isoleucine                                                                    | 10.4                                                                            | 26.9                                                                                                                     | 4                                           |
| L-Leucine                                                                       | 20.5                                                                            | 50.8                                                                                                                     | 7                                           |
| L-Lysine                                                                        | 17.1                                                                            | 11.3                                                                                                                     | 4                                           |
| L-Methionine                                                                    | 6.3                                                                             | 4.3                                                                                                                      | 5*                                          |
| L-Phenylalanine                                                                 | 11.3                                                                            | 7.3                                                                                                                      | 7.6**                                       |
| L-Threonine                                                                     | 9.1                                                                             | 6.1                                                                                                                      | 4                                           |
| L-Tryptophan                                                                    | 2.8                                                                             | 1.8                                                                                                                      | 1                                           |
| L-Valine                                                                        | 12.6                                                                            | 32.2                                                                                                                     | 5                                           |
| L-Histidine                                                                     | 6.0                                                                             | 3.9                                                                                                                      | 2                                           |
| L-Alanine                                                                       | 6.3                                                                             | 4.3                                                                                                                      |                                             |
| L-Arginine                                                                      | 8.0                                                                             | 5.2                                                                                                                      | 3                                           |
| L-Aspartic Acid                                                                 | 15.4                                                                            | 10.3                                                                                                                     |                                             |
| L-Glutamic Acid                                                                 | 49.0                                                                            | 32.5                                                                                                                     |                                             |
| Glycine                                                                         | 4.0                                                                             | 2.6                                                                                                                      |                                             |
| L-Proline                                                                       | 25.1                                                                            | 15.8                                                                                                                     |                                             |
| L-Serine                                                                        | 12.8                                                                            | 8.5                                                                                                                      |                                             |
| L-Tyrosine                                                                      | 12.1                                                                            | 7.9                                                                                                                      |                                             |
|                                                                                 |                                                                                 |                                                                                                                          |                                             |
| *Per NRC Guidelines, Cystine may replace 50-66.6% of the Methionine requirement | **Per NRC Guidelines, Tyrosine may replace 50% of the Phenylalanine requirement | Reference: Council, N.R. (1995). Nutrient Requirements of Laboratory Animals: Fourth Revised Edition. (Washington (DC)). |                                             |
